# Supplementary material for: Preparation and Characterization of Acrylic and Methacrylic Phospholipid-Mimetic Polymer Hydrogels and Their Applications in Optical Tissue Clearing
Source: MDPI journal article supplement (doi:10.3390/polym16020241), 2024-01-15
Supplement: s1 [file s1]

## Supporting Information

### Preparation and Characterization of Acrylic and Methacrylic Phospholipid-Mimetic Polymer Hydrogels and Their Applications in Optical Tissue Clearing

Nanako Dei<sup>1</sup>, Kazuhiko Ishihara<sup>2</sup>, Akikazu Matsumoto<sup>1</sup>, Chie Kojima<sup>1\*</sup>

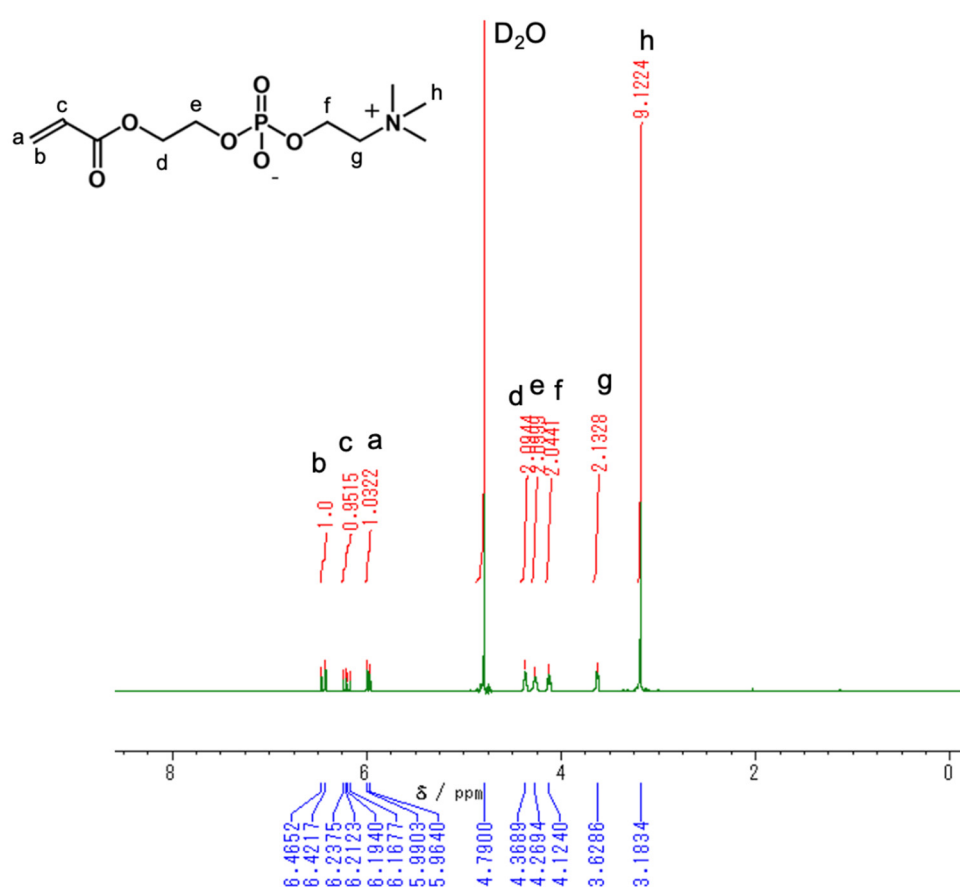

Figure S1.  $^1\text{H}$  NMR spectrum of APC.

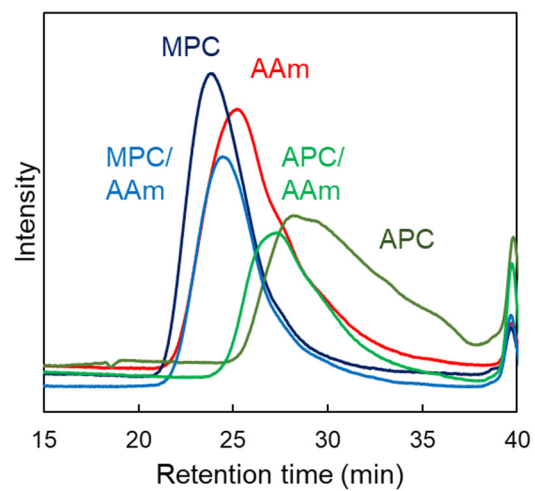

Figure S2. GPC chromatograms of synthesized polymers.

(A)

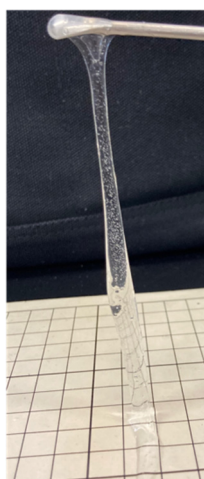

(B)

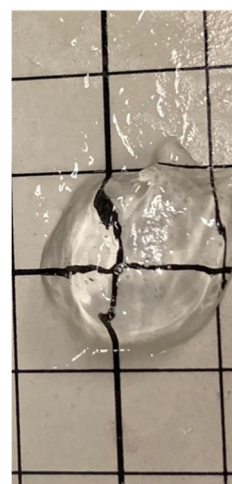

Figure S3. Photos of the PMPC-t hydrogels crosslinked at (A) 13 mM and (B) 19.5 mM.

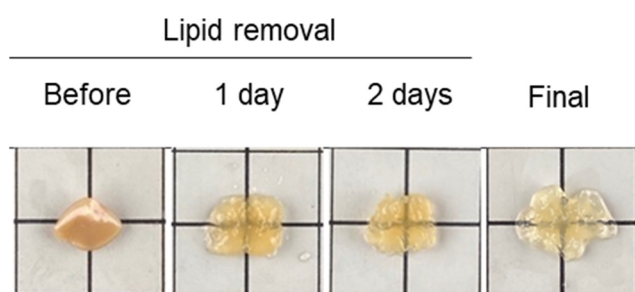

Figure S4. Optical clearing of tumor tissues using the PMPC-t hydrogel by electrophoresis.
